# Supplementary material
Source: PubMed Central journal article supplement (PMC2922748)
Supplement: NIHMS225397-supplement-supplement_1.pdf [file NIHMS225397-supplement-supplement_1.pdf]

## Supplemental Information

Table: Output from the ALLSPACE analysis of the cryo-data

| SPACEGROUP<br>based on | Phase resid(No)              |     | Phase resid(No)              |     | Target residual |
|------------------------|------------------------------|-----|------------------------------|-----|-----------------|
|                        | v.other spots<br>(90 random) |     | v.theoretical<br>(45 random) |     |                 |
| 1 p1                   | 33.5                         | 224 | 25.1                         | 224 |                 |
| 2 p2                   | 32.9*                        | 112 | 16.4                         | 224 | 50.1            |
| 3b p12_b               | 77.8                         | 73  | 24.3                         | 14  | 35.1            |
| 3a p12_a               | 73.0                         | 71  | 19.9                         | 10  | 34.6            |
| 4b p121_b              | 19.1*                        | 73  | 14.0                         | 14  | 35.1            |
| 4a p121_a              | 17.4*                        | 71  | 9.5                          | 10  | 34.6            |
| 5b c12_b               | 77.8                         | 73  | 24.3                         | 14  | 35.1            |
| 5a c12_a               | 73.0                         | 71  | 19.9                         | 10  | 34.6            |
| 6 p222                 | 56.9                         | 256 | 16.5                         | 224 | 40.8            |
| 7b p2221b              | 62.0                         | 256 | 16.5                         | 224 | 40.8            |
| 7a p2221a              | 61.2                         | 256 | 40.4                         | 224 | 40.8            |
| 8 p22121               | 24.8*                        | 256 | 16.5                         | 224 | 40.8            |
| 9 c222                 | 56.9                         | 256 | 16.5                         | 224 | 40.8            |
| 10 p4                  | 27.1*                        | 272 | 16.4                         | 224 | 40.3            |
| 11 p422                | 53.2                         | 562 | 16.5                         | 224 | 36.8            |
| 12 p4212               | 24.6*                        | 562 | 16.5                         | 224 | 36.8            |
| 13 p3                  | 65.4                         | 118 | --                           | --  | 33.5            |
| 14 p312                | 56.6                         | 299 | 14.2                         | 22  | 34.1            |
| 15 p321                | 59.7                         | 305 | 33.1                         | 34  | 34.4            |
| 16 p6                  | 61.7                         | 348 | 16.4                         | 224 | 38.8            |
| 17 p622                | 58.9                         | 716 | 16.4                         | 224 | 36.1            |

\* = acceptable  
 ! = should be considered  
 ` = possibility
